# Supplementary material for: Resazurin reduction assays for screening of anti-tubercular compounds against dormant and actively growing Mycobacterium tuberculosis, Mycobacterium bovis BCG and Mycobacterium smegmatis
Source: Oxford University Press journal article supplement (doi:10.1093/jac/dkm207), 2007-06-22
Supplement: dkm207_Supplementary_Data.zip [file dkm207_Supplementary_Data.zip]

Archive with 1 entries (1 files):
- dkm207supp.pdf
