# Supplementary material for: Resazurin reduction assays for screening of anti-tubercular compounds against dormant and actively growing Mycobacterium tuberculosis, Mycobacterium bovis BCG and Mycobacterium smegmatis
Source: Oxford University Press journal article supplement (doi:10.1093/jac/dkm207), 2007-06-22

## Supplementary data

**Figure S1.** (a) Aerobic REMA plate set up of *M. tuberculosis*. The blue wells show inhibition of bacterial growth and the pink wells show resazurin reduction as a result of bacterial growth and metabolism. (b) A typical HyRRA assay for *M. tuberculosis*. Top panel: tubes 24 h post-resazurin addition. 1, NFS 500  $\mu$ M; 2, NFS 50  $\mu$ M; 3, FLD 500  $\mu$ M; 4, FLD 50  $\mu$ M; 5, NIT 500  $\mu$ M; 6, NIT 50  $\mu$ M; 7, INH 40  $\mu$ g/mL; 8, INH 4  $\mu$ g/mL; 9, MTZ 10 mM; 10, MTZ 1 mM; 11, Methylene Blue media control; 12, decolorized Methylene Blue control culture indicating anoxia (D); 13, faded Methylene Blue control culture indicating hypoxia (F); 14, control culture, pink colour indicates cell viability under hypoxia/anoxia; 15, media control, blue colour indicates no growth. Lower panel: tubes incubated for 5 days post-resazurin addition. 1, NFS 500  $\mu$ M; 2, NFS 50  $\mu$ M; 3, FLD 500  $\mu$ M; 4, FLD 50  $\mu$ M; 5, NIT 500  $\mu$ M; 6, NIT 50  $\mu$ M; 7, INH 40  $\mu$ g/mL; 8, INH 4  $\mu$ g/mL; 9, MTZ 10 mM; 10, MTZ 1 mM. NFS, nitrofurazone; FLD, furaltadone; NIT, nitrofurantoin; INH, isoniazid; MTZ, metronidazole.

(a)

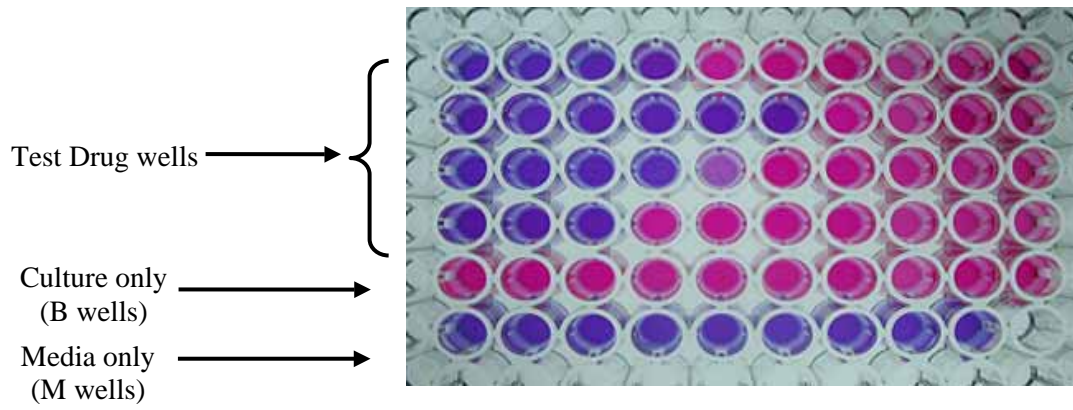

(b)

**16-20 h post- resazurin addition**

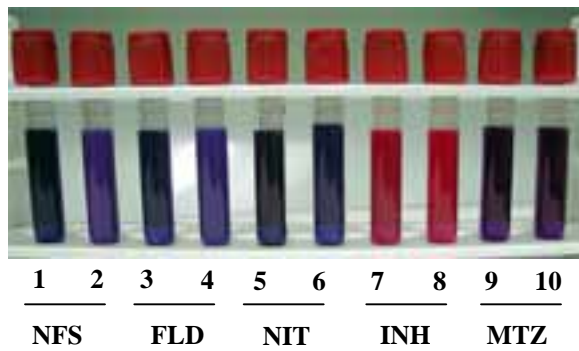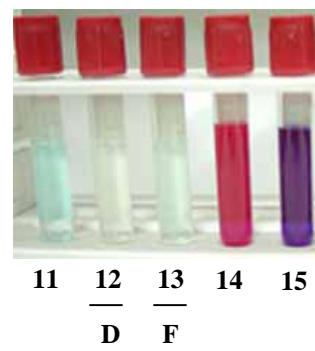

**5 days post- resazurin**

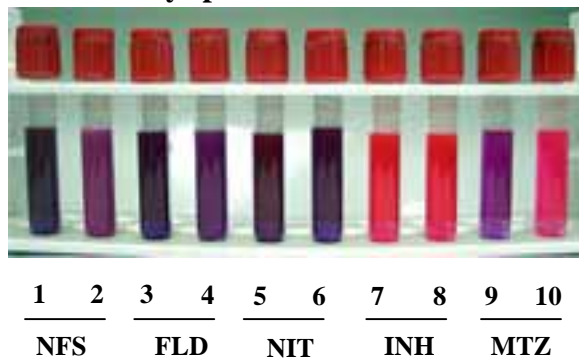

Supplement: dkm207_Supplementary_Data.zip [file dkm207_Supplementary_Data.zip › dkm207supp.pdf]
